# Supplementary material
Source: HighWire-hosted journal article supplement (http://www.cmaj.ca/highwire/filestream/59137/field_highwire_adjunct_files/6/diet-salvado-5-at.pdf)
Supplement: diet-salvado-5-at.pdf [file diet-salvado-5-at.pdf]

**Baseline means values (95%CI) and changes at 1, 3, 5 and 7 years of follow-up of body weight, and physical activity on participants without and with metabolic syndrome at baseline.**

|                                         | Individuals without metabolic syndrome at baseline |                            |                            |         | Individuals with metabolic syndrome at baseline |                            |                            |         |
|-----------------------------------------|----------------------------------------------------|----------------------------|----------------------------|---------|-------------------------------------------------|----------------------------|----------------------------|---------|
|                                         | MedDiet+EVOO<br>n=663                              | MedDiet+nuts<br>n=662      | Control group<br>n=594     | P-value | MedDiet+EVOO<br>n=1236                          | MedDiet+nuts<br>n=1062     | Control group<br>n=1094    | P-value |
| <b>Total body weight (kg)</b>           |                                                    |                            |                            |         |                                                 |                            |                            |         |
| Baseline                                | 73.4 (72.5-74.2)                                   | 72.3 (71.5-73.8)           | 73.0 (72.1-73.8)           | 0.2     | 78.5 (77.8-79.1)                                | 79.2 (78.5-79.9)           | 79.1 (78.4-79.9)           | 0.3     |
| 1 year                                  | -0.1 (-0.3-0.1)                                    | 0.2 (-0.1-0.4)             | -0.0 (-0.3-0.3)            | 0.3     | -0.2 (-0.4, -0.0)                               | -0.1 (-0.3, 0.6)           | -0.3 (-0.5, -0.1)          | 0.5     |
| 3 years                                 | -0.2 (-0.6-0.1)                                    | 0.3 (-0.0-0.6)             | 0.0 (-0.4-0.5)             | 0.1     | -0.6 (-0.9, -0.4)                               | -0.4 (-0.7, -0.1)          | -0.6 (-1.0, -0.2)          | 0.5     |
| 5 years                                 | -0.2 (-0.6-0.3)                                    | 0.2 (-0.2-0.6)             | -0.4 (-0.9-0.1)            | 0.2     | -1.0 (-1.3, -0.6)                               | -0.5 (-1.0, -0.1)          | -0.6 (-1.1, -0.2)          | 0.3     |
| 7 years                                 | -0.2 (-1.1-0.6)                                    | 0.6 (-0.3-1.5)             | 0.5 (-0.4-1.5)             | 0.4     | -0.6 (-1.3, 0.1)                                | -1.1 (-1.9, -0.2)          | -0.5 (-1.4, 0.3)           | 0.6     |
| <b>Physical activity (METS/min/day)</b> |                                                    |                            |                            |         |                                                 |                            |                            |         |
| Baseline                                | 270 (252-289)                                      | 297 (277-318) <sup>a</sup> | 250 (229-270) <sup>b</sup> | 0.004   | 219 (206-232) <sup>a</sup>                      | 223 (210-237) <sup>a</sup> | 192 (177-207) <sup>b</sup> | 0.003   |
| 1 year                                  | 18 (-3-40)                                         | -8 (-30-15)                | 9 (-13-30)                 | 0.2     | 19 (3, 34)                                      | 6 (-7, 19)                 | 11 (-5, 27)                | 0.5     |
| 3 years                                 | 18 (-5-41)                                         | -1 (-25-23)                | 18 (-15-51)                | 0.5     | 20 (5, 36)                                      | 16 (-0.6, 33)              | 13 (-5, 31)                | 0.8     |
| 5 years                                 | -7 (-36-22)                                        | -5 (-35-25)                | 4 (-28-37)                 | 0.9     | 29 (11, 46)                                     | 7 (-14, 29)                | 5 (-18, 28)                | 0.2     |
| 7 years                                 | -22 (-78-35)                                       | -41 (-100-19)              | -69 (-139-1.3)             | 0.6     | 11 (-23, 45)                                    | -11 (-55, 33)              | - 2 (-49, 28)              | 0.6     |

Abbreviations: MedDiet, Mediterranean Diet; EVOO, extra-virgin oil. Changes were calculated between baseline and each of the time points. P-values for comparisons between intervention groups was tested by analysis of variance (ANOVA) followed by post-hoc tests with Scheffe correction.

P<sup>a</sup>vs<sup>b</sup><0.005 by post-hoc tests with Scheffe correction.
